# Supplementary figures and images for: Morpho-Physiological Classification of Italian Tomato Cultivars (Solanum lycopersicum L.) According to Drought Tolerance during Vegetative and Reproductive Growth
Source: MDPI journal article supplement (doi:10.3390/plants10091826), 2021-09-02

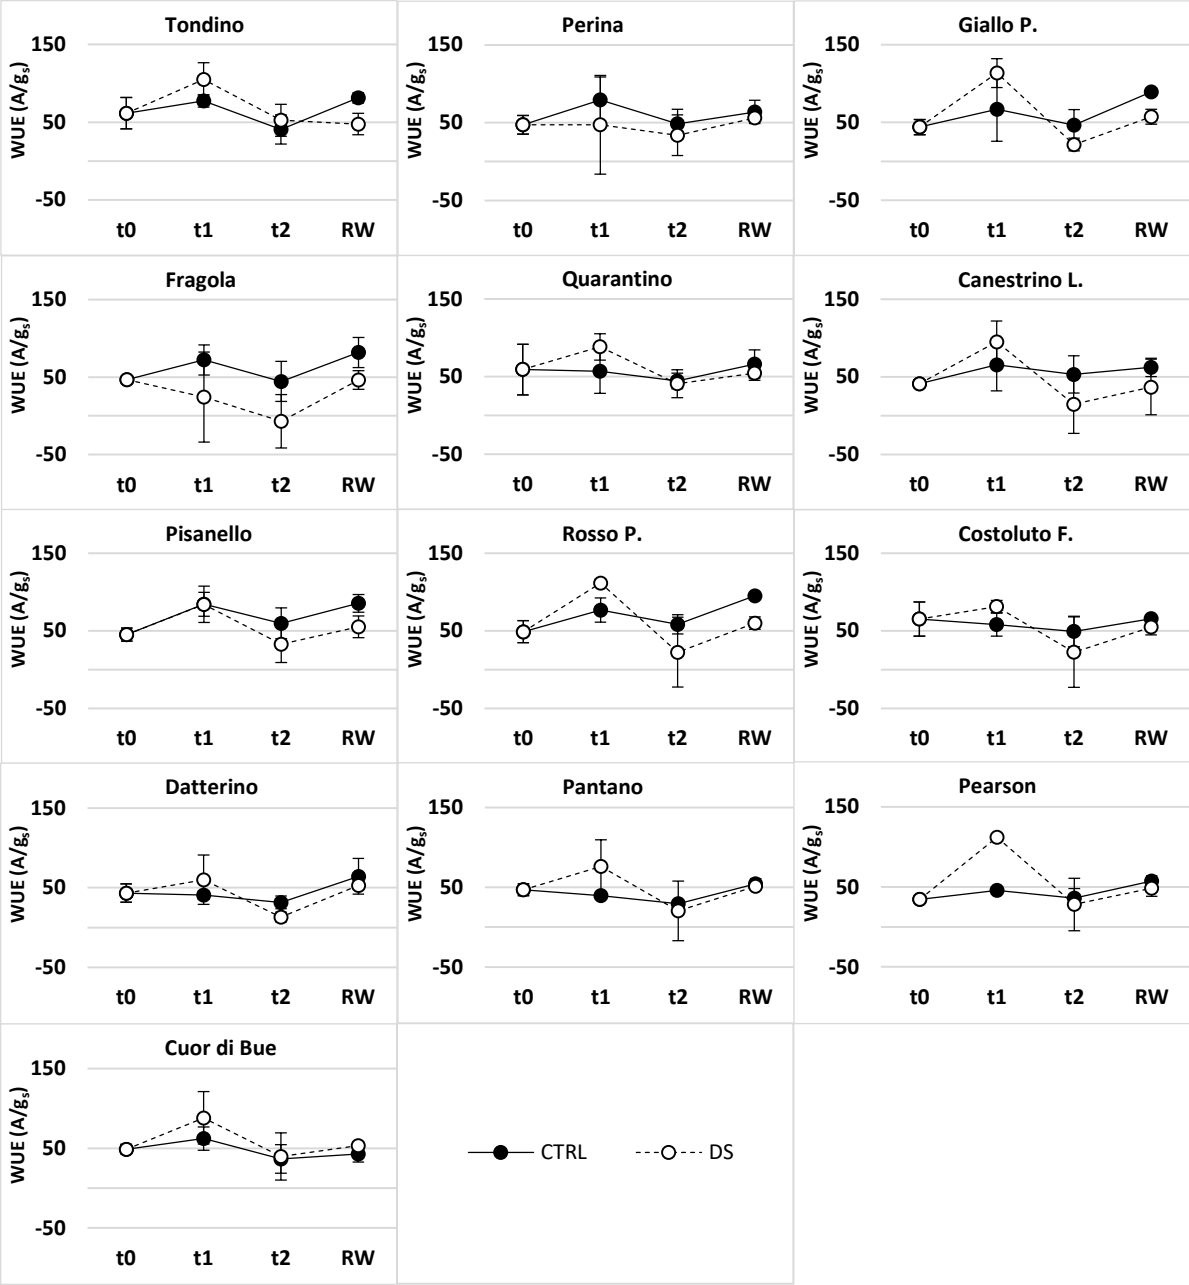

Supplement: s1 [file s1]

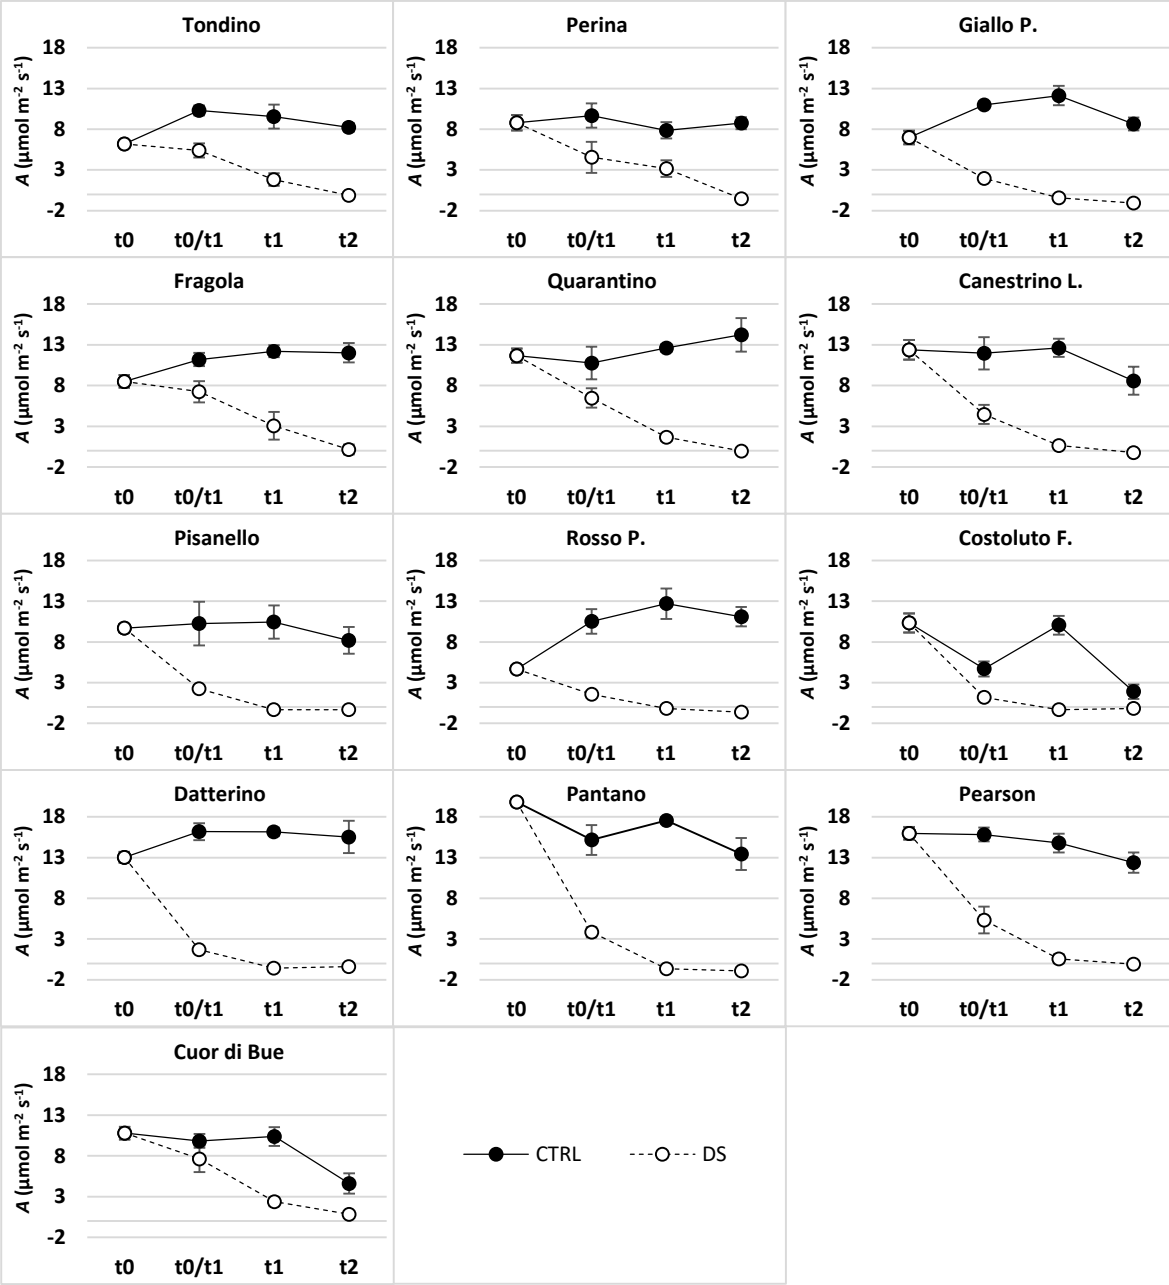

Supplement: s1 [file s1]

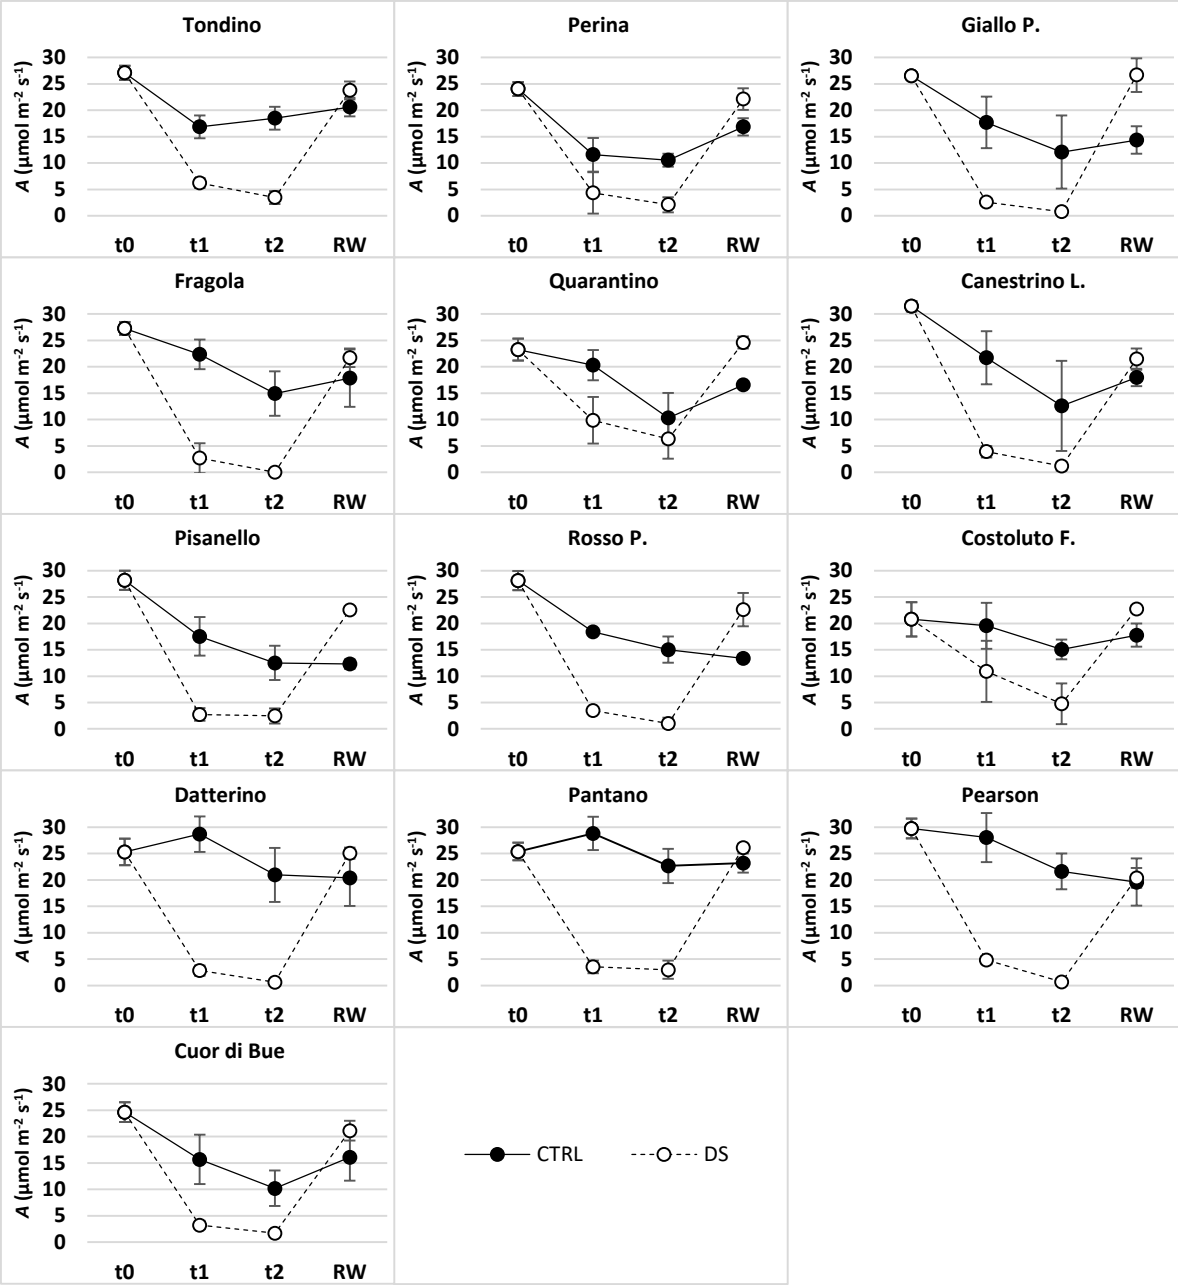

Supplement: s1 [file s1]

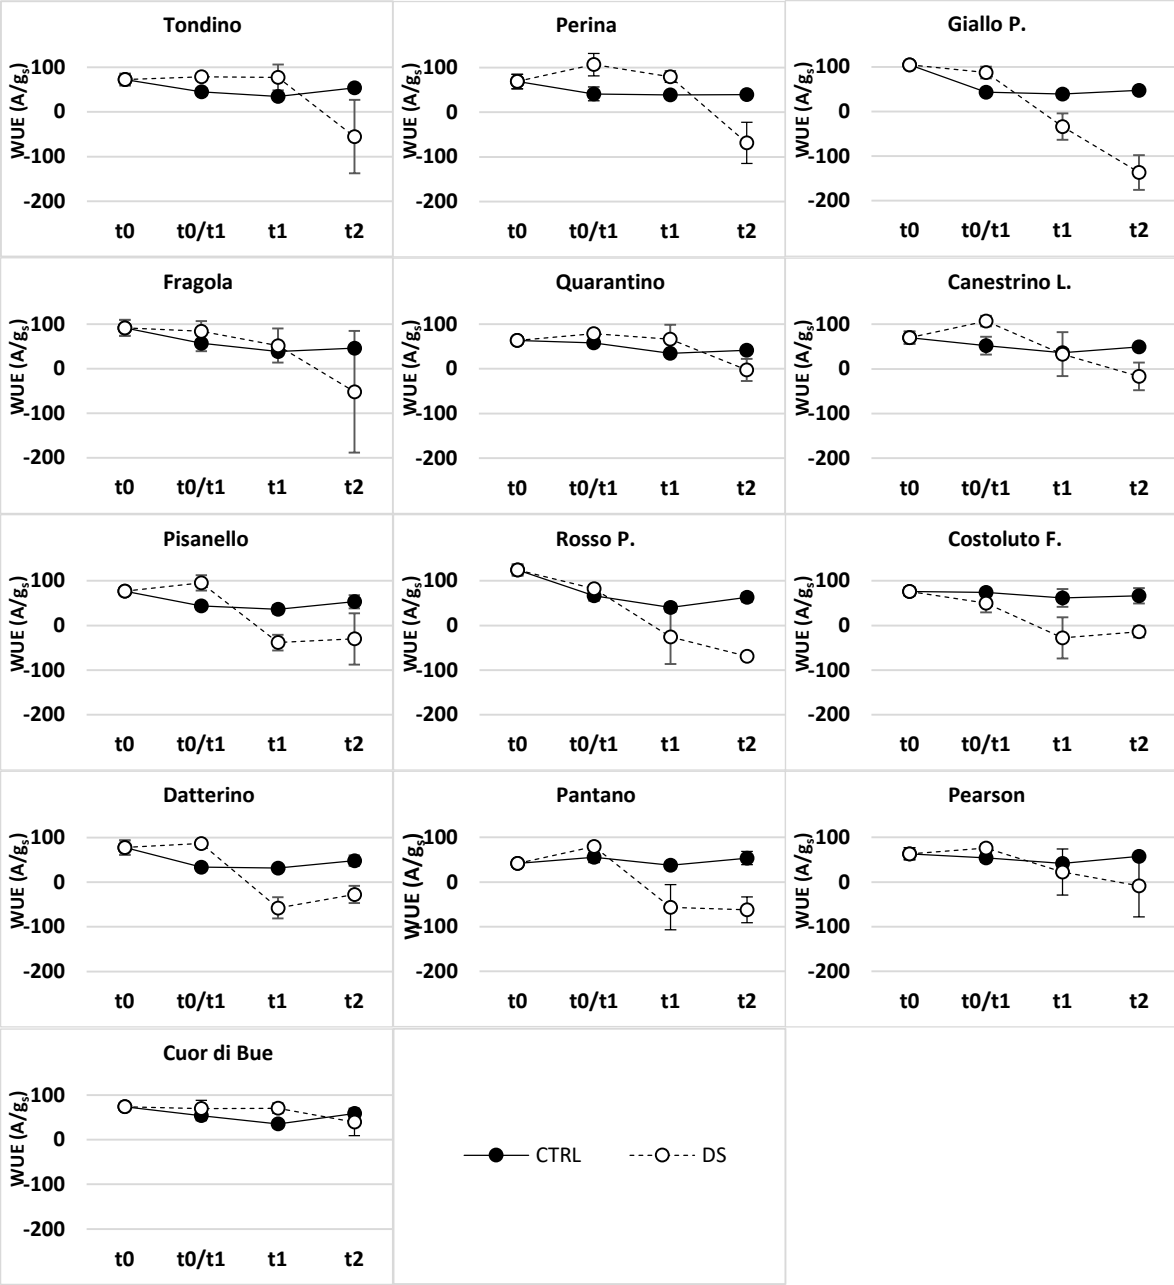

Supplement: s1 [file s1]

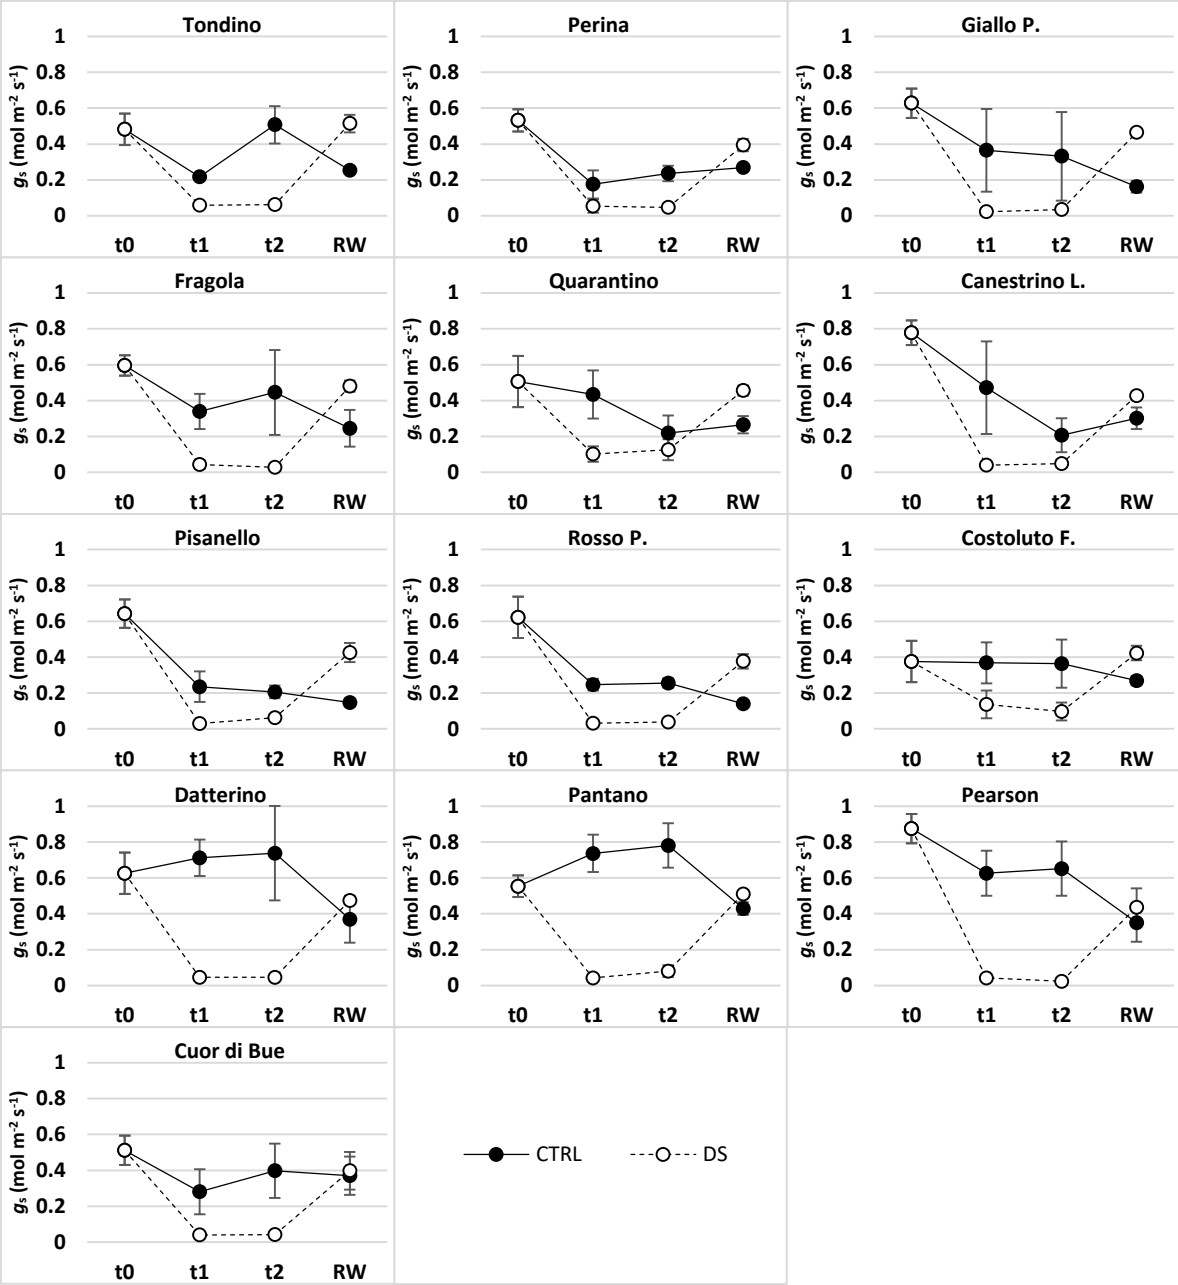

Supplement: s1 [file s1]

a. 8

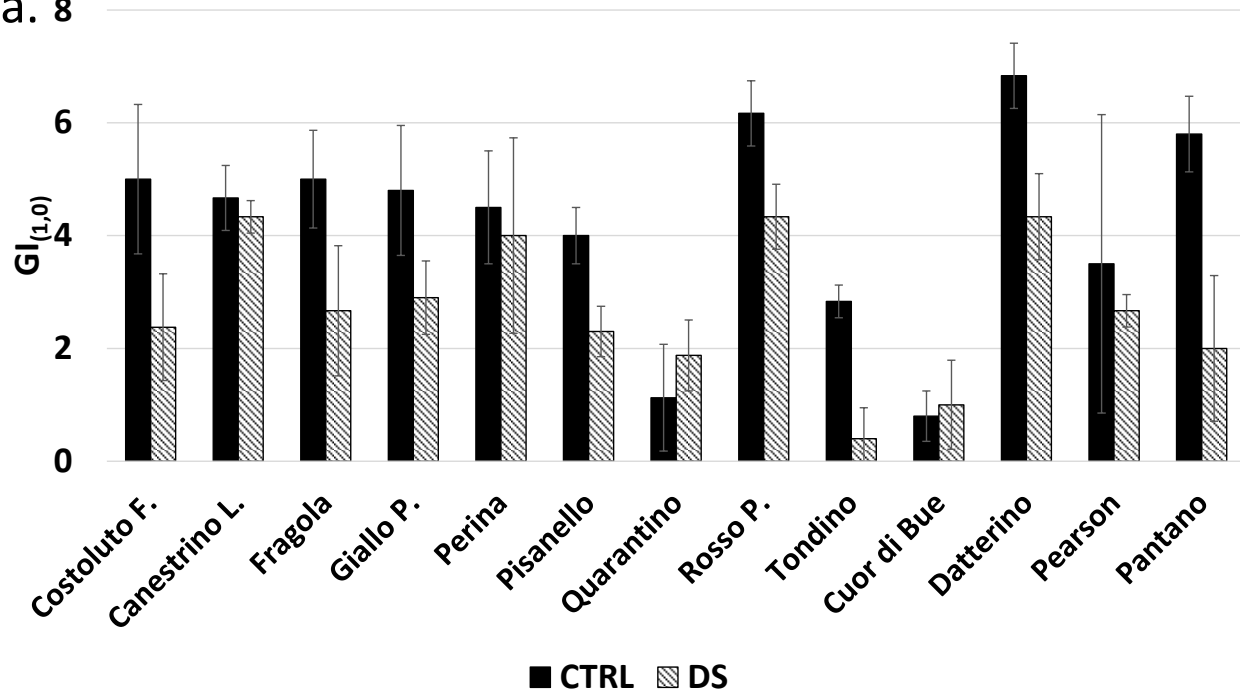

b. 12

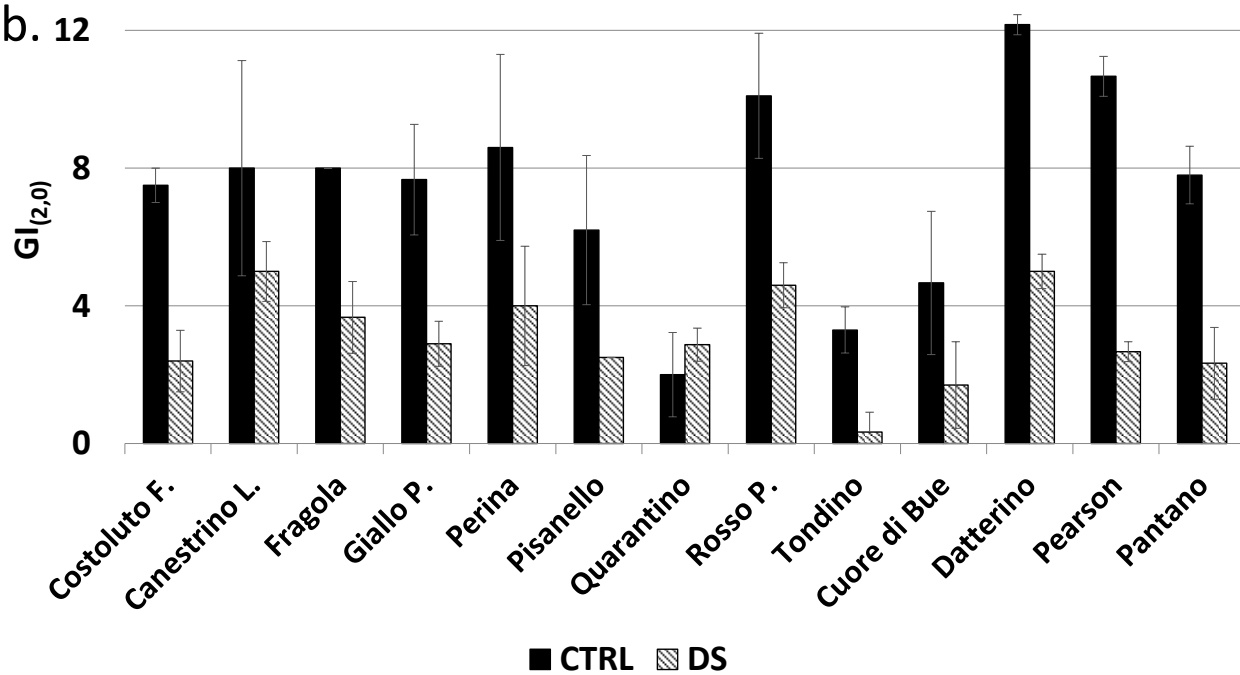

Supplement: s1 [file s1]

a. 30

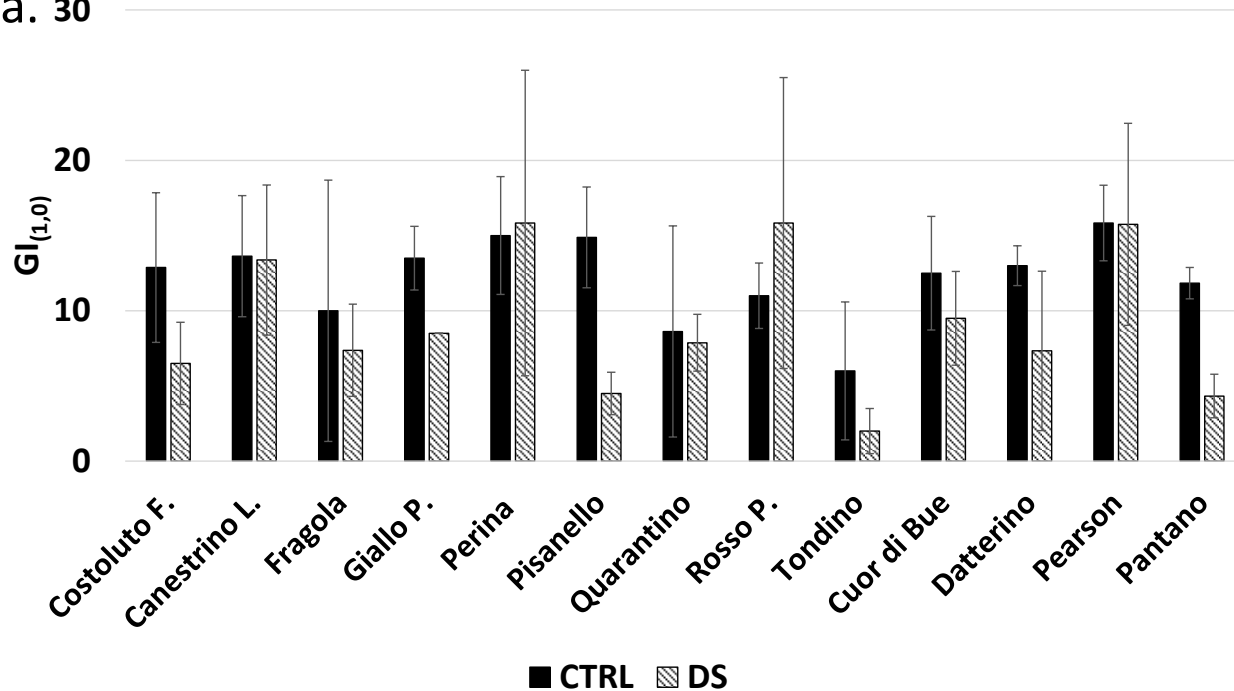

b. 30

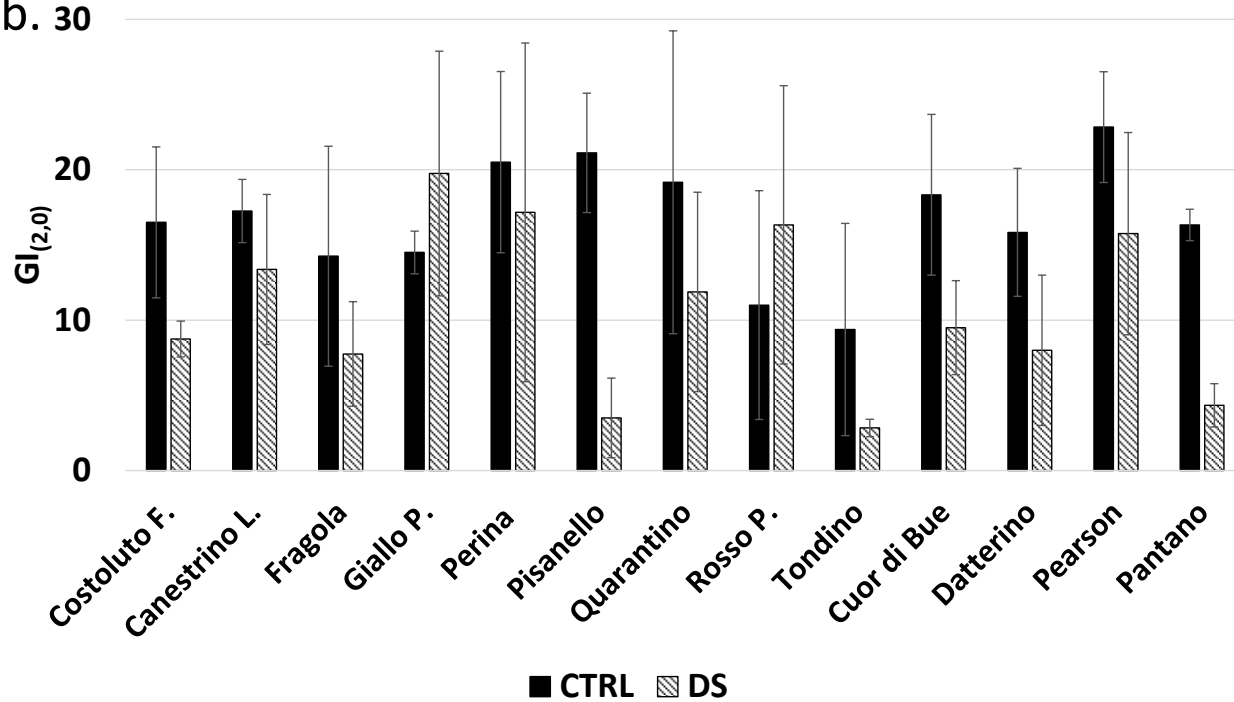

Supplement: s1 [file s1]

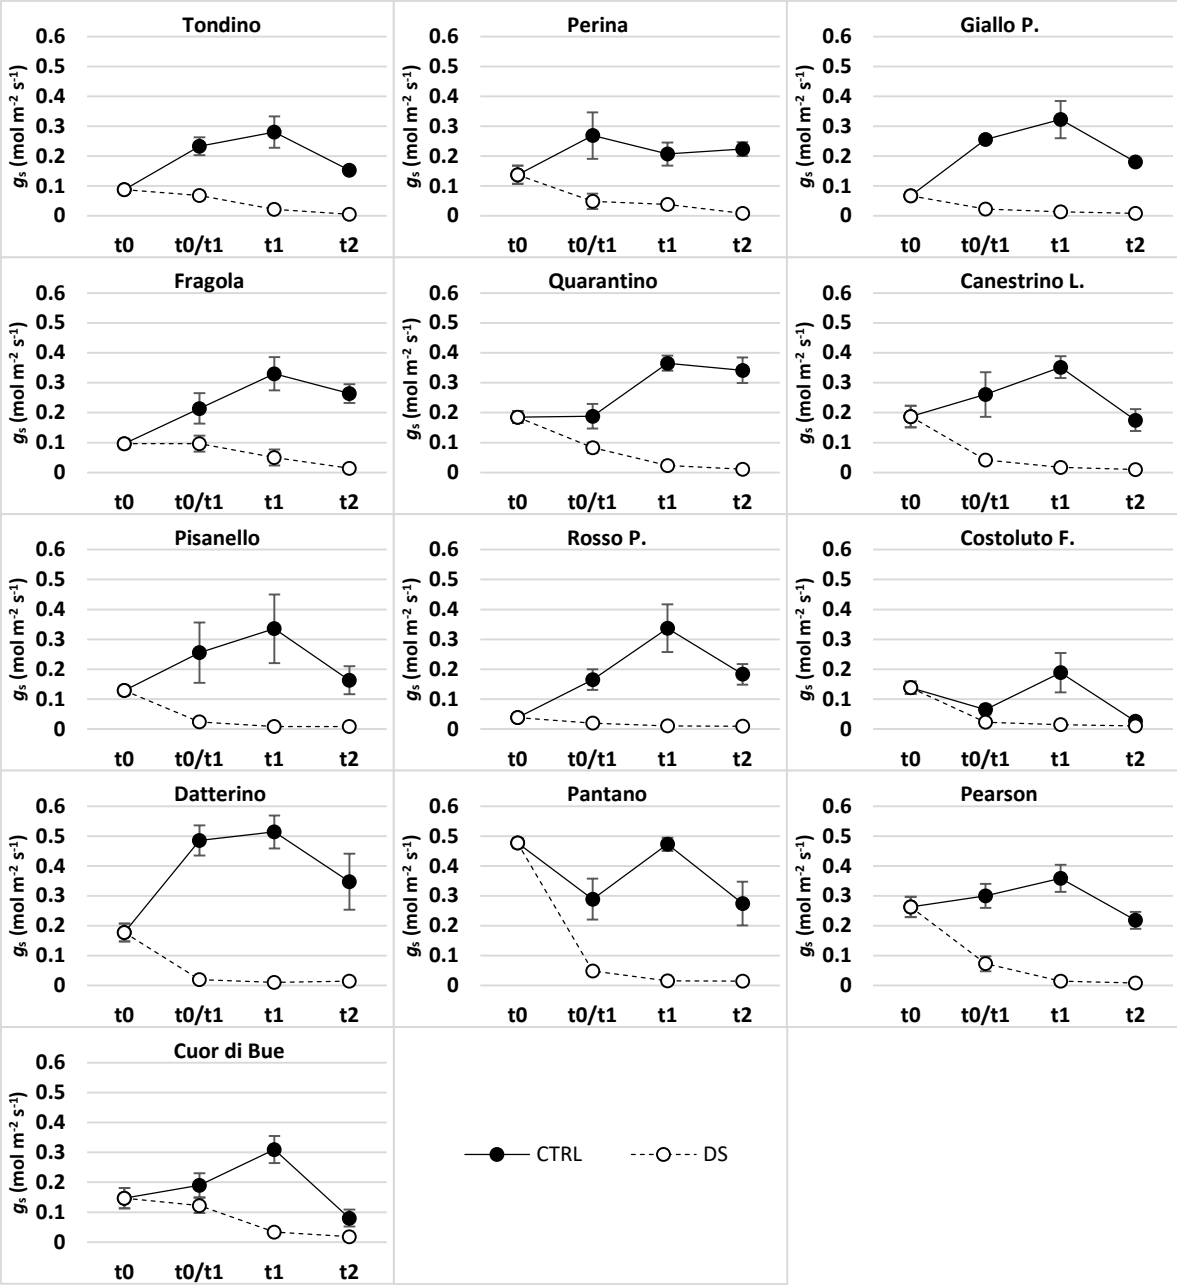

Supplement: s1 [file s1]
